# 1    **Effects of substrate on shrimp growth, water quality and bacterial community in** 2    **the biofloc system nursing *Penaeus vannamei* postlarvae**

3    Hai-Hong Huang <sup>a\*</sup>, Chao-Yun Li <sup>b†</sup>, Yan-Ju Lei <sup>a,c</sup>, Wei-Qi Kuang <sup>a</sup>, Bo-Lan Zhou<sup>a</sup>,  
4    Wan-Sheng Zou <sup>a,d</sup>, Pin-Hong Yang <sup>a,e</sup>

5    <sup>a</sup> *College of life and environmental sciences, Hunan University of Arts and Science,*  
6    *Changde Hunan 415000, China*

7    <sup>b</sup> *Shandong Vocational Animal Science and Veterinary College, Weifang Shandong*  
8    *261061, China*

9    <sup>c</sup> *Hunan Provincial Collaborative Innovation Center for Efficient and Health*  
10    *Production of Fisheries, Changde Hunan 415000, China*

11    <sup>d</sup> *Hunan Provincial Key Laboratory for Health Aquaculture and Product Processing in*  
12    *Dongting Lake Area, Changde Hunan 415000, China*

13    <sup>e</sup> *Hunan Engineering Research Center of Aquatic Organism Resources and*  
14    *Environmental Ecology, Changde Hunan 415000, China*

## 15    **Abstract**

16    This study aimed to investigate the effects of substrate on water quality, shrimp growth  
17    and bacterial community in the biofloc system with a salinity of 5‰. Two treatments,  
18    biofloc system with (sB) or without (nB) addition of elastic solid packing filler (nylon)  
19    as substrate, were set up. *Penaeus vannamei* postlarvae (PL, ~ stage 15) were stocked at

---

\* Corresponding author. E-mail address: shinkanh@nwsuaf.edu.cn, shinkanh@huas.edu.cn.

† Co-first author.

a density of 4000 PL m<sup>-3</sup> in each treatment with triplicates for a 28-days culture experiment, taking glucose as carbon source (C:N 15:1). Results showed that the survival rate (96.3±3.6%), FCR (0.76±0.06) and productivity (1.54±0.12 kg m<sup>-3</sup>) in sB treatment were significantly better than those in nB treatment (81.0±7.1%, 0.98±0.08 and 1.14±0.09 kg m<sup>-3</sup>,  $P < 0.05$ ). All water parameters were in the recommended ranges. Substrate showed significant effect on TAN, TSS, turbidity, biofloc volume, pH and carbonate alkalinity ( $P < 0.05$ ). Actinobacteria (4.0-22.7%), Bacteroidetes (10.4-33.5%), Firmicutes (0.2-11.2%), Planctomycetes (4.0-14.9%) and Proteobacteria (29.4-59.0%) were the most dominant phyla for both treatments. However, the bacterial community in sB treatment showed to be significantly different from that in nB treatment (Jaccard distance 0.94±0.01,  $P = 0.001$ ). Substrate showed significant effects on Shannon, Heip, Pielou and Simpson index, as well as relative abundances of Actinobacteria, Bacteroidetes and Planctomycetes ( $P < 0.05$ ). The results suggested that addition of substrate affected the shrimp growth, water quality and bacterial community in the biofloc system nursing *P. vannamei* PL with a 5‰ salinity.

## KEYWORDS

*Penaeus vannamei*; Biofloc technology; Low salinity; Substrate; Bacterial community

## 1 INTRODUCTION

Crustacean is the most valuable group in fish trade in the world, accounting for 23.0% in terms of value with an 8.3% share in culture production, compared to the 65.4% Vs.

40 79.8% of fish, and the 11.6% Vs. 11.9% of mollusks and other aquatic invertebrates  
41 (FAO, 2018). Among the cultured crustaceans, *Penaeus vannamei* (Boone, 1931) is the  
42 most important species whose production accounted for 53.0% of the total crustaceans  
43 production (FAO, 2018).

44 Prenursery of postlarvae (PL) is a very important step during culture of *P.*  
45 *vannamei* in many places (Mishra et al., 2008; Rezende et al., 2018). In the  
46 conventional prenursery system, PL are intensively stocked at a high density (up to 60  
47 PL L<sup>-1</sup>) with small-scale water volume and carefully nursed for 15-60 days (Schveitzer  
48 et al., 2017), to save water, land and energy resources, and to deliver large individuals  
49 that are resistant to environmental conditions to increase the survival and growth  
50 performance during the grow-out phase (Mishra et al., 2008; Rezende et al., 2018).  
51 However, in this high-stocking-density system, serious cannibalism behavior,  
52 competition for space and degradation of water quality would affect growth and  
53 survival of PL (Esparza-Leal et al., 2015). The use of artificial substrate is an effective  
54 approach to supply additional surface and refuge for shrimp during prenursery  
55 (Tierney et al., 2020). Additionally, biofloc technology (BFT) has also been tried to be  
56 used to prenursery of *P. vannamei* PL (Khanjani et al., 2017; Schveitzer et al., 2017), to  
57 control the problems usually appeared in the traditional prenursery system, such as  
58 biosecurity and toxic ammonia and nitrite (Samocha, 2010), due to the advantages of  
59 this technology on nitrogen assimilation *in situ* and pathogen control under minimal or  
60 zero water exchange conditions (Avnimelech, 2015; Huang, 2020). Furthermore,  
61 several studies have used substrates in biofloc systems to reinforce the controlling of

62 water quality and the growth performance of PL by supplying a natural food through  
63 the periphyton growing on the substrate during the prenursery stage (Peiro-Alcantar et  
64 al., 2019; Rezende et al., 2018; Tierney et al., 2020).

65 *P. vannamei* is an euryhaline species, and can be cultured at low salinity conditions  
66 less than 1.0‰, which is a trend that will continue to grow globally (Roy et al., 2010).  
67 Osmoregulation capability of *P. vannamei* develops gradually in the postlarvae stages  
68 and can be acclimated to salinities as low as 0.5‰ by stage 12 (Van Wyk et al., 1999),  
69 indicating that PL could be nursed under low salinity conditions. As well, biofloc  
70 technology has been successfully used for prenursery of *P. vannamei* PL under salinity  
71 conditions of 8-16‰ (Esparza-Leal et al., 2016; Luo et al., 2019). However, application  
72 of substrate in prenursery of *P. vannamei* PL in the biofloc system under a low-salinity  
73 condition has been not documented yet.

74 In this study, it is aimed to estimate the effects of substrate on shrimp growth  
75 performance and water quality in the biofloc system nursing *P. vannamei* postlarvae  
76 (PL) under a salinity condition as low as about 5‰. Furthermore, the effects of  
77 substrate on the bacterial community diversity and composition in this system were  
78 also investigated.

## 79 2 MATERIAL AND METHODS

### 80 2.1 Ethic statement

81 The culture experiments were carried out at a local farm of Bifuteng eco-agriculture  
82 development Co., Ltd. (BEAD Co., Ltd., Changde, China, Lat. 28°53'57.88" N, Long.

111°38'3.08" E), with indoor tanks, under principles in good laboratory animal care, according to the national standard of China (GB/T 35892-2018), 'Laboratory animal-Guideline for ethical review of animal welfare'. The manuscript does not require ethical approval.

## 2.2 Experimental design

There two treatments with three replicates for each were set up in the present study, biofloc system with (sB) and without (nB) addition of substrate. In the sB treatment, 52.4% of the tank internal surface was equally coated with elastic solid packing filler (nylon, with a diameter of 15 cm).

Before the beginning of the experiment, tanks (width × length × depth = 2 × 2.5 × 1.3 m, 6.5 m<sup>3</sup> in volume) connected with a Roots blower air pump (CRS-100, Changsheng mechanical and electrical equipment Co., Ltd., Zhangqiu, Shandong, China) were filled 5.0 m<sup>3</sup> (1.0 m in depth) culture water with a salinity of about 5.0‰ per tank. The water for culture experiment was prepared according to the method of Ray and Lotz (2017), with some modifications. Briefly, artificial sea salt powder (Qianglong corporation, Tianjin, China), and food-grade chemical reagents of KCl, MgCl<sub>2</sub>, CaCl<sub>2</sub> and NaHCO<sub>3</sub> were added to tap water, to manage an initial salinity of 5.02±0.08‰, with K<sup>+</sup>, Mg<sup>2+</sup> and Ca<sup>2+</sup> concentrations of 301.3±5.9, 925.2±12.1 and 306.7±6.9 mg L<sup>-1</sup>, respectively, and a pH value of about 8.0. After that, sterilization with 10.0 mg L<sup>-1</sup> of chlorinedioxide followed by neutralization with 1.0 mg L<sup>-1</sup> of

103 ascorbic acid was executed according to the processes of previous studies (Gaona et al.,  
104 2017; Lara et al., 2017).

105 At the beginning of the experiment, *P. vannamei* PL was randomly assigned to each  
106 tank at a density of 4000 PL per m<sup>3</sup>. Those PL (~PL15, 2.5±0.4 mg) were kindly  
107 supplied from BEAD Co., Ltd. and had been treated with a desalinating and  
108 acclimation procedure to adapt the experimental conditions before being assigned (Luo  
109 et al., 2019; Van Wyk et al., 1999). Next, during the 28-days experimental period, PL  
110 were fed with a commercial formulated shrimp diet (crude protein 40.0%, crude lipid  
111 5.0%, crude fiber 5.0%, crude ash 15.0%, moisture 12.0%, Alpha corporation,  
112 Jiangmen, Guangdong, China), with a frequency of four times (6:00, 12:00, 18:00,  
113 24:00) a day, basing on the feeding table and the estimated total biomass according to  
114 methods of Van Wyk et al. (1999). Besides, glucose (food grade, carbohydrate content  
115 90.0%, Fufeng biotechnology Co., Ltd., Hohhot, Inner Mongolia Autonomous, China)  
116 was added as exogenous carbon source to the experimental tanks, according to an  
117 inputted carbon to nitrogen ratio (C:N) of 15:1 (Huang et al., 2021). The inputted C:N  
118 was the C:N contained in the inputted materials (feed and carbon source), and  
119 determined basing on the carbon contents contained in carbon source and feed (Kumar  
120 et al., 2017, Tinh et al. 2021) and the conception that 25% of the feed nitrogen is  
121 theoretically converted as shrimp biomass (Piedrahita, 2003). Throughout the whole  
122 experimental period, no water exchange was operated, but evaporating loss was  
123 complemented with dechlorinated tap water per week.

During 14-28 d of the experiment, partial biofloc was removed by using a side-stream settling chamber equipped a submersible pump (JGP-2500L, SENSEN Group Co., Ltd., Zhoushan, China) which ran for 6 h every day at a rate of 2.25 m<sup>3</sup> per h to maintain a biofloc volume < 15 mL L<sup>-1</sup>.

### 2.3 Determination of water parameters

Water temperature, dissolved oxygen and pH were detected each day by using electric analyzers (YSI-ProPlus, Yellow Springs Instruments Inc., OH, USA; pH-100 meter, LICHEN Sci-Tech, Co., Ltd., Shanghai, China). Water samples were collected once a week and passed through a 0.22-μm pore size microfilter (Xinya purification equipment Co., Ltd, Shanghai, China). Then, the dissolved total nitrogen in water (DTN), total ammonia nitrogen (TAN), nitrite, nitrate, carbonate alkalinity, and total suspended solid (TSS), were determined according to the standard methods (APHA, 1995). Additionally, the whole total nitrogen (WTN) in water body of each treatment was also determined every week with water sample without filtration (APHA, 1995). And the total nitrogen contained in biofloc (BTN) was defined as the total nitrogen content contained in biofloc in per liter water and was determined by the difference between WTN and DTN. With an Imhoff cone, 1-liter water sample was settled for 15 min after which the sediment volume was read as the biofloc volume (settleable solids, BFV) (Avnimelech, 2015), and the supernatant was used to measure the turbidity (APHA, 1995).

### 2.4 Growth performance measurements

145 Thirty PL were selected randomly and individually weighed to the nearest 0.1 mg with  
146 an electric balance (AUX220, Shimadzu, Japan) each week. Survival rate, weekly  
147 increment of body weight (wiW), specific growth rate (SGR), feed conversion rate  
148 (FCR) and productivity were calculated according the following formulates:

$$\text{Survival rate (\%)} = [(\text{survival shrimp counts}) / \text{stocked shrimp counts}] \times 100$$

$$\text{wiW (g week}^{-1}\text{)} = (\text{fbw} - \text{ibw}) / \text{culture weeks}$$

$$\text{SGR (\% d}^{-1}\text{)} = [(\ln \text{fbw} - \ln \text{ibw}) / \text{culture days}] \times 100$$

$$\text{FCR} = \text{total mass of feed given} / \text{gained shrimp biomass}$$

$$\text{Productivity (kg m}^{-3}\text{)} = \text{harvested shrimp biomass} / \text{culture water volume}$$

149       Wherein, fbw and ibw represented the final and initial mean body weight of PL,  
150 respectively.

## 151 **2.5 High-throughput sequencing of 16S rRNA gene and data processing**

152 Along the experimental period, water was sampled every week. Briefly, 50 ml water  
153 was collected from each tank of a treatment according to the method of  
154 Martínez-Córdova et al. (2018), pooled as one sample and filtered through a 0.22-μm  
155 pore size membrane. Then, the membrane was stored at -80 °C for extraction of  
156 bacterial DNA genome with an E.Z.N.A<sup>TM</sup> Mag-Bind Soil DNA Kit (OMEGA  
157 Bio-Tek, Inc., GA, USA), according to the manufacturers' instructions.

158       The V3-V4 region of 16S rRNA gene of bacterial DNA genome was amplified by  
159 using the universal primers, 341F: 5'-CCTACGGGNGGCWGCAG-3' and 805R:  
160 5'-GACTACHVGGGTATCTAATCC-3', in a 30-μl mixtures containing microbial



161 DNA (10 ng/μl) 2 μl, forward primer (10 μM) 1 μl, reverse primer (10 μM) 1 μl, and 2X  
162 KAPA HiFi Hot Start Ready Mix 15 μl (TaKaRa Bio Inc., Japan), via a procedure with  
163 a thermal instrument (Applied Biosystems 9700, USA): 1 cycle of denaturing at 95°C  
164 for 3 min, first 5 cycles of denaturing at 95°C for 30 s, annealing at 45°C for 30 s,  
165 elongation at 72°C for 30 s, then 20 cycles of denaturing at 95°C for 30 s, annealing at  
166 55°C for 30 s, elongation at 72°C for 30 s and a final extension at 72°C for 5 min. The  
167 PCR product was purified and recovered with MagicPure Size Selection DNA Beads  
168 (TransGen Biotech Co., Ltd., Beijing, China). And then, the purified PCR product was  
169 quantified and normalized with a Qubit ssDNA Assay Kit (Life Technologies, USA), to  
170 construct the 16S gene library for high-throughput sequencing on the Miseq platform  
171 according to the standard protocol (Illumina, USA) by Sangon Biotech (Shanghai) Co.,  
172 Ltd. The raw data produced from high-throughput sequencing has been deposited at  
173 NCBI with accession number of PRJNA646765.

174 Data processing for the high-throughput sequencing data was carried out under the  
175 QIIME 2 (Quantitative Insights Into Microbial Ecology, Version 2019.10) framework  
176 (Bolyen et al., 2019). In brief, ambiguous nucleotides, adapter sequences and primers  
177 contained in reads, and short reads with length less than 30 bp were removed with the  
178 cutadapt plugin (Martin, 2011). After that, bases in the two ends of reads with quality  
179 score lower than 25 were trimmed. Thereafter, chimeras were filtered, and pair-ended  
180 reads were joined, dereplicated, to obtain high-quality reads which were clustered to  
181 operational taxonomic units (OTUs) with an identity of 0.97 by using the Vsearch tool  
182 (Rognes et al., 2016). Thereafter, the counts of OTUs were normalized by 16S rRNA

183 gene copy number based on rrnDB database (version 5.6) with the QIIME 2 plugin of  
184 q2-gcn-norm.

## 185 **2.6 Bacterial diversity analysis**

186 Bacterial community diversity was analyzed with Plugin diversity of QIIME 2 basing  
187 on the normalized counts of OTUs. Metrics regard to alpha diversity, such as Shannon  
188 index, richness indexes of Margalef, dominance indexes of Berger-Parker and Simpson,  
189 and evenness indexes of Heip and Pielou, were computed with the diversity plugin of  
190 QIIME 2. Besides, beta Jaccard index (distance) were also determined with this plugin,  
191 and then significantly tested by using PERMANOVA with 999 permutations  
192 (Anderson, 2001). Basing on the OTUs composition of samples, each sample was  
193 plotted into a PCA diagram with STAMP (Parks et al., 2014).

## 194 **2.7 Bacterial composition analysis**

195 OTUs were annotated by referring to the GreenGene database 13.8, collapsed at  
196 phylum, class, order, family and genus levels, respectively, with a QIIME 2 Plugin of  
197 taxa. At each level, relative frequencies of species were calculated with the normalized  
198 counts of OTUs. Differential analysis for phylum proportion between both treatments  
199 was conducted with STAMP (Parks et al., 2014) and LEfSe (Segata et al., 2011).

## 200 **2.8 Statistical analyses**

201 Data was statistically analyzed with the SPSS platform for windows (version 22.0, IBM  
202 Co., NY, USA). Student's T Test were executed for comparison of growth parameters  
203 between both treatment, as soon as normality distribution and homogeneity of data  
204 were proved with Shapiro-Wilk's test and Levene's test, respectively. Or else,  
205 non-parametric Mann-Whitney U test was conducted. Percentage data was submitted to  
206 arcsine transformation. Furthermore, during each stage, ANOVA with repeated  
207 measurements was used to test the significance of main effects and interactions of  
208 substrate and time on water parameters, bacterial diversity indices and bacterial  
209 composition data under Mauchly's test of Sphericity assuming condition, or else, the *P*  
210 value was corrected by using Greenhouse-Geisser test. Differences were considered  
211 significant at  $P < 0.05$ .

## 212 **3 RESULTS**

### 213 **3.1 Water quality**

214 The levels of dissolved oxygen and temperature in the present study were above 5.0 mg  
215 L<sup>-1</sup> and 26.0 °C, respectively (Table 1). The effects of time on both parameters were  
216 significant ( $P < 0.05$ , Table 1). Whereas, substrate showed no significant effect on the  
217 levels of dissolved oxygen and temperature ( $P > 0.05$ , Table 1).

218 The carbonate alkalinity in sB treatment was maintained at a high level of  
219 306.5±51.7 mg L<sup>-1</sup> CaCO<sub>3</sub>, although it was lower than that in nB treatment (373.7±12.4  
220 mg L<sup>-1</sup> CaCO<sub>3</sub>, Table 1). The pH values in nB treatment and sB treatment were

221 7.20±0.14 and 7.11±0.03, respectively (Table 1). Both parameters were significantly  
222 affected by substrate and time, as well as their interactions ( $P < 0.05$ , Table 1).

223 The mean concentrations of the three inorganic nitrogen compounds were at low  
224 levels in the present study ( $< 1.0 \text{ mg L}^{-1}$ , Table 1). Those compounds were not  
225 significantly affected by substrate, time and their interaction ( $P > 0.05$ ), with  
226 exceptions of the substrate main effect and the interaction of substrate and time on TAN  
227 ( $P < 0.05$ , Table 1).

228 No significant substrate effect on WTN (whole total nitrogen in waterbody), BTN  
229 (total nitrogen contained in biofloc in per liter water) and DTN (dissolved total nitrogen  
230 in waterbody) was found ( $P > 0.05$ , Table 1). Whereas, the effects of time on those  
231 parameters were significant, as well as the interactions of substrate and time on WTN  
232 and DTN ( $P < 0.05$ , Table 1).

233 The biofloc volume (BFV) levels in nB treatment and sB treatment were similar,  
234 with a value of  $8.8 \pm 2.3$  and  $8.3 \pm 2.3 \text{ mL L}^{-1}$ , respectively (Table 1). However, the total  
235 suspended solids (TSS) and turbidity in sB treatment ( $491.3 \pm 150.2 \text{ mg L}^{-1}$ , and  
236  $299.5 \pm 92.0$  nephelometric turbidity units, NTU) were higher than those in nB treatment  
237 ( $148.5 \pm 31.3 \text{ mg L}^{-1}$  and  $111.9 \pm 56.3$  NTU, Table 1). Substrate showed significant main  
238 effects on those three parameters ( $P < 0.05$ , Table 1). The effects of time on BFV and  
239 turbidity were also significantly, as well as the interaction of substrate and time on BFV  
240 ( $P > 0.05$ , Table 1).

## 241 **3.2 Growth performance**

242 During the 28-days culture experiment, the average body weights of shrimp in sB  
243 treatment were higher than those of nB treatment (Fig. 1). At the end, although the final  
244 body weight in sB treatment ( $0.40 \pm 0.03$  g) was not significantly different from that of B  
245 treatment ( $0.36 \pm 0.04$  g,  $P = 0.596$ , Table 2), the survival rate ( $96.3 \pm 3.6\%$ ) and  
246 productivity ( $1.54 \pm 0.12$  kg m<sup>-3</sup>) of the former treatment were significantly higher than  
247 those of the latter ( $81.0 \pm 7.1\%$  and  $1.14 \pm 0.09$  kg m<sup>-3</sup>,  $P < 0.05$ , Table 2). The feed  
248 conversion rate (FCR) in sB treatment ( $0.76 \pm 0.06$ ) was significantly lower than that in  
249 nB treatment ( $0.98 \pm 0.08$ ,  $P = 0.044$ , Table 2). There no significant difference was  
250 observed between both treatments for the weekly increment of body weight (wiW) and  
251 specific growth rate (SGR) of shrimp during the culture experiment ( $P > 0.05$ , Table 2).

### 252 3.3 Bacterial diversity

253 The Shannon index for bacterial community in sB treatment ( $6.77 \pm 0.18$ ) was  
254 higher than that in nB treatment ( $6.14 \pm 0.07$ , Table 3). Substrate, time and their  
255 interaction showed significant effects on this index ( $P < 0.05$ , Table 3). The Shannon  
256 index in sB treatment obtained the highest value at 7 d and then slightly decreased, but  
257 that in nB treatment peaked at 21 d (Fig. 2 a).

258 Higher OTU counts ( $6238.3 \pm 353.8$ ) and Margalef index ( $387.7 \pm 28.0$ ) was  
259 observed in sB treatment, when compared to that in nB treatment ( $5713.5 \pm 368.2$  and  
260  $343.9 \pm 22.0$ , Table 3). Both indexes significantly affected by time ( $P < 0.05$ ), but not by  
261 substrate ( $P > 0.05$ , Table 3). Those two indexes showed similar changing trends with  
262 the Shannon index in each treatment (Fig. 2 b and c).

263 The evenness indexes, Heip index and Pielou index, in sB treatment ( $0.018 \pm 0.001$   
264 and  $0.538 \pm 0.003$ ) and nB treatment ( $0.013 \pm 0.001$  and  $0.493 \pm 0.01$ , Table 3) peaked at  
265 14 d and 21 d, respectively (Fig. 2 d and e). The main effects and interactions of  
266 substrate and time on both indexes were significant ( $P < 0.05$ ), with exception of the  
267 interaction on Heip index ( $P = 0.544$ , Table 3).

268 The Simpson index in sB treatment ( $0.955 \pm 0.003$ ) was higher than that in nB  
269 treatment ( $0.927 \pm 0.010$ , Table 3). This index in sB treatment displayed a peak value at  
270 14 d, but that in nB treatment showed a decreasing trend during experiment (Fig. 2 f).  
271 Substrate and time significantly affected this index ( $P < 0.05$ , Table 3). Whereas, the  
272 Berger-Parker index in sB treatment ( $0.152 \pm 0.014$ ) was lower than that in nB treatment  
273 ( $0.193 \pm 0.020$ , Table 3). Substrate was not significantly affected this index ( $P > 0.05$ ,  
274 Table 3). The change trend of Berger-Parker index in the present study was contrary to  
275 that of the Simpson index in each treatment (Fig. 2 g).

276 The bacterial community distances within nB treatment and sB treatment were  
277  $0.76 \pm 0.36$  and  $0.77 \pm 0.37$ , respectively (Table 4). PCA analysis also showed that water  
278 samples collected from the same treatment were closer than those from the other  
279 treatment, basing on the OTUs composition (Fig. 3). In addition, the bacterial beta  
280 diversities between both treatments were significantly different with a Jaccard distance  
281 of  $0.94 \pm 0.01$  ( $P = 0.001$ , PERMANOVA, Table 4).

### 282 **3.4 Bacterial composition profile**

283 Thirty phyla were assigned for the OTUs in the present study. The most dominant phyla  
284 in both treatments were Actinobacteria (4.0-22.7%), Bacteroidetes (10.4-33.5%),  
285 Firmicutes (0.2-11.2%), Planctomycetes (4.0-14.9%) and Proteobacteria (29.4-59.0%)  
286 (Fig. 4 a). Besides, Chloroflexi and Verrucomicrobia were one of the dominant phyla in  
287 nB treatment (0.1-11.4%) and sB treatment (0.3-16.2%), respectively (Fig. 4a). Among  
288 those seven phyla mentioned above, the proportions of Chloroflexi, Planctomycetes  
289 and Verrucomicrobia were significantly different between both treatments from a point  
290 of view of the whole experimental period ( $P < 0.05$ , Fig. 4 b). The main effects and  
291 interactions of substrate and time on proportions of those seven phyla were significant  
292 ( $P < 0.05$ ), except the substrate effects on Firmicutes and Proteobacteria, and the  
293 interaction of substrate and time on Planctomycetes ( $P > 0.05$ , Table 5).

294 The bacterial composition profiles on class, order, family and genus levels were  
295 showed in Fig. 1S-Fig. 4S, respectively.

296 The LEfSe analysis showed that an unassigned genus and the phylum  
297 Verrucomicrobia were the most significant biomarkers for nB and sB, respectively (Fig.  
298 5).

## 299 4 DISCUSSION

### 300 4.1 Effects of substrate on water quality

301 All the water parameters determined in the present study were within the acceptable  
302 range for culturing *P. vannamei* (Furtado et al., 2014; Hargreaves, 2013; Schweitzer et  
303 al., 2013a; Van Wyk et al., 1999; Xu et al., 2012; Zhang et al., 2017). Addition of

substrate showed significantly effect on TSS in the present study ( $P < 0.05$ ), with higher level in sB treatment than that in nB treatment. Consistently, Schweitzer et al. (2013b) also observed significant effect of substrate on TSS with higher levels in the biofloc systems with substrate. Whereas, in another previous study, the TSS levels in the biofloc systems with substrate were lower than that in the system without substrate (Rezende et al., 2018). It is proposed here that substrates with different shape have different effects on TSS. For example, nylon or polyester fiber net with a small mesh size (1-2 mm) has the ability to filter the water and capture biofloc, thereby reducing the amount of solids in the rearing water, leading to the lower TSS value (Rezende et al., 2018). On the contrary, the substrate with a larger mesh size, such as 2.5 cm (Tierney et al., 2020), would filter both water and biofloc. Similarly, in the present study, elastic solid packing filler (nylon) was used as substrate which is a long open space composed with nylon yarns radially fixed to a central rope. Thus, the flocs would be not retained within this open space of substrate, especially under the rough aeration condition of the biofloc system, leading to an increasing of TSS level in water body.

In the present study, it was found that the turbidity levels in both treatments were increased continuously. This might be contributed to the removal operation for biofloc during 14-28 d of the experiment in the present study. The turbidity in the present study was determined on water sample without big-size biofloc which settled by using an Imhoff cone for 15 min, indicating that this parameter was correlated to the content of small-size biofloc. Previous studies have showed that the bacterial groups are different between small- and big-size bioflocs (Chen et al., 2019; Huang et al., 2020). Therefore,



the removal operation in this study might make settleable solids (big-size biofloc) as well as bacterial groups attached be removed from the water column, which would improve the growth of bacteria adhering on small-size biofloc retained in the water body, by reducing the competition from bacteria relating with big-size biofloc, and in turn, prompting formation of small-size suspended biofloc and increasing the turbidity.

Substrate showed significant effect on turbidity in the present study ( $P = 0.002$ ). It was thought that the addition of artificial substrates may influence the water circulation in the tanks, leading to smaller turbulence in the water, and in turn to facilitating sedimentation or particle aggregation and formation of large flocs, which reduces the suspended solids and thus the turbidity in the water column (Ferreira et al., 2016; Fleckenstein et al., 2020). However, in the present study, the turbidity level in sB treatment was found to be higher than that in nB treatment. It was speculated that substrate might play a positive role in the process of turbidity increasing caused by the removal operation for big-size biofloc discussed above.

Substrate also showed significant effect on carbonate alkalinity in the current study ( $P < 0.001$ ). And the carbonate alkalinity in sB treatment was lower than that in nB treatment in the current study, indicating that more alkalinity was consumed in biofloc system with substrate. This might be contributed to the different bacterial communities which led to different bacterial activities consuming  $\text{HCO}_3^-$  (Ebeling et al., 2006). Corroboratively, more diverse bacterial community in sB treatment (Shannon index  $6.77 \pm 0.18$ ) than that in nB treatment (Shannon index  $6.14 \pm 0.07$ ), and different bacterial communities between both treatments (Jaccard distance  $0.94 \pm 0.01$ ,  $P < 0.001$ ) were

observed in the present study. Nevertheless, the inferring function profile of bacterial community should be investigated to better understand the difference on  $\text{HCO}_3^-$  consumption between both treatments next.

The results of ANOVA with repeated measurements showed that addition of substrate showed significantly effects on TAN, biofloc volume (BFV), and pH in the present study ( $P < 0.05$ ). Meanwhile, the interactions of substrate and time on most water parameters, such as whole total nitrogen in waterbody (WTN), total dissolved nitrogen (DTN), TAN, BFV, carbonate alkalinity and pH, were significant in the present study, indicating that the changing styles of these parameters along with time elapsing were different between the biofloc systems with and without addition of substrate. Rezende et al. (2018) also observed that some water parameters were significantly affected by the interactions of the rearing day and treatment (substrate).

## 4.2 Effects of substrate on shrimp growth

The body weight of shrimp in treatment with substrate would be significantly prompt, when compared to that without substrate (Olier et al., 2020; Schweitzer et al., 2013b), via forming periphytons on substrate as supplementary natural food which could be fed by shrimp for 24 h a day (Anand et al., 2019; Asaduzzaman et al., 2008; Kumar et al., 2017). In the present study, the final body weight, weekly increment of body weight (wiW) and specific growth rate (SGR) of shrimp in sB treatment were elevated by 10.0-11.1%, compared to those in nB treatment, which were similar with the results (8.4-11.0%) observed by Tierney et al. (2020). Previous studies showed that the raw

material (Mani et al., 2021; Peiro-Alcantar et al., 2019; Rezende et al., 2018) and shape (Fleckenstein et al., 2020) of substrates could affect its elevating efficiency on growth performance of shrimp. For example, periphyton nutritional values were shown to be dependent on substrate type (Tinh et al., 2021). And natural or vegetable substrates was found to be more beneficial to growth of shrimp than artificial substrates (Mani et al., 2021). It is also thought that the substrate composed of individual sheets with a large opening or mesh size and a low overall surface area would show less improving effect on shrimp production metrics. For instance, Ferreira et al. (2016) found that the addition of substrate with an amount equivalent 400% of the lateral area of the tanks significantly elevated the body weight of shrimp, but that with 200% did not. Similarly, Fleckenstein et al. (2020) and Tierney et al. (2020) also observed that addition of substrate only increased the total in-tank surface area by 13.4% and 21%, respectively, did not lead to significant effect on any shrimp production metrics. In this study, the substrate used was a long open space composed with nylon yarns radially fixed to a central rope, covering only 52.4% of the tank internal surface, which might be contributed to the non-significant benefit for the final body weight, wiW and SGR of shrimp in sB treatment, compared to those in nB treatment ( $P > 0.05$ ).

Nevertheless, in the present study, the survival rate and productivity in sB treatment significantly increased when compared with those in nB treatment ( $P < 0.05$ ). Substrate could act as a refuge to add space and reduce the cannibalism behavior, leading to more survival. And this increased space by addition of substrate reduced the relative stocking density, which is beneficial for shrimp growth. An inverse

relationship between stocking density and growth performance of shrimp was found in previous studies (Esparza-Leal et al., 2015; Esparza-Leal et al., 2020 ; Liu et al., 2017; Panigrahi et al., 2019; Peixoto et al., 2018). Moreover, the feed conversion rate (FCR) in sB treatment significantly decreased, compared with that in nB treatment ( $P < 0.05$ ). Bioflocs which mostly grew on tank wall or substrate as periphyton could be grazed by shrimp as natural supplementary food (Tinh et al., 2021), reducing input of artificial feeds, and consequently decreasing the FCR (Avnimelech, 2015). Undoubtedly, substrate addition facilitates this feeding behavior of shrimp by supplying a niche for preying on biofloc (Anand et al., 2019; Asaduzzaman et al., 2008).

#### 4.3 Effects of substrate on diversity of bacterial diversity

Generally, highly diverse bacterial community including 18-40 phyla were observed in waterbody of biofloc systems raising *P. vannamei* (Baliga et al., 2021; Ferreira et al., 2021; Huerta-Rabago et al., 2019; Vargas-Albores et al., 2019), with a Shannon index as high as 5.31-7.23 (Addo et al., 2021; Chen et al., 2019; Gao et al., 2019; Huang et al., 2021; Jiang et al., 2020; Kim et al., 2021; Mariana et al., 2018). Similarly, in the present study, 30 phyla were observed in both treatments with a Shannon index of 6.14-6.77. In the biofloc system, the environment rich in organic matter could form several trophic levels which facilitate the growth of a number of bacterial phyla (Fleckenstein et al., 2020), resulting in a high bacterial diversity.

Between both treatments in the present study, the beta diversity Jaccard index was significantly different, indicating different bacterial communities in both treatments.

412 Corroboratively, from a point of view of the whole experimental period, higher  
413 Shannon index, OTU counts, Margalef index, Heip index, Pielou index and Simpson  
414 index, but lower Berger-Parker index of bacterial community in sB treatment were  
415 observed when compared to those in nB treatment, indicating higher bacterial diversity,  
416 richness and evenness, but lower dominance of predominant species (Magurran, 2004),  
417 in the biofloc system with addition of substrate (sB treatment).

418 The results of ANOVA with repeated measurements revealed that substrate showed  
419 significant effects on some alpha diversity indexes, such as Shannon index, Heip index,  
420 Pielou index and Simpson index ( $P < 0.05$ ). Meanwhile, the interactions of substrate  
421 and time on Shannon index and Pielou index were also significant ( $P < 0.05$ ), indicating  
422 that the changing styles of those indexes over time were different between treatments in  
423 the present study. Consistently, the bacterial community in sB treatment obtained the  
424 most diverse situation at 7 d with the highest Shannon index, but in nB treatment, the  
425 Shannon index increased gradually and peaked at 21 d, indicating that substrate  
426 addition accelerated the formation of high-diverse bacterial community in the biofloc  
427 system.

428 All alpha diversity indexes were significantly affected by time ( $P < 0.05$ ),  
429 indicating a time-dependent succession pattern of bacterial diversity in biofloc systems  
430 regardless of addition of substrate, which was also observed in other studies (Jiang et al.,  
431 2020; Kim et al., 2021; Wang et al., 2020; Xu et al., 2019).

#### 432 **4.4 Effects of substrate on bacterial composition**

433 In general, Proteobacteria and Bacteroidetes were found to be the most dominant phyla  
434 in marine biofloc systems rearing *P. vannamei* (Ferreira et al., 2021; Huerta-Rabago et  
435 al., 2019; Jiang et al., 2020; Mariana et al., 2018; Martínez-Córdova et al., 2018;  
436 Vargas-Albores et al., 2019), as well as in biofloc systems with low salinities (Addo et  
437 al., 2021; Huang et al., 2021). Similarly, in the present study, those two phyla together  
438 accounted for 41.33-82.44% and 55.56-74.69% in nB treatment and sB treatment,  
439 respectively. Proteobacteria have a diverse phenotypic and phylogenetic lineage and  
440 widely dispersed in the environment rich in organic compounds (Kerstens et al., 2006;  
441 Kirchman, 2002; Rud et al., 2017), such as biofloc systems. Bacteroidetes serve as a  
442 degrader of polymeric organic matter and are found in a range of habitats (Thomas et al.,  
443 2011; Woebken et al., 2007). Additionally, Actinobacteria, Chloroflexi, Firmicutes,  
444 Planctomycetes and Verrucomicrobia were important phyla in both treatments of the  
445 present study, which were also commonly detected in biofloc systems stocking  
446 white-leg shrimp (Deng et al., 2018; Ferreira et al., 2021; Huang et al., 2021;  
447 Huerta-Rabago et al., 2019; Jiang et al., 2020; Luis-Villaseñor et al., 2016;  
448 Martínez-Córdova et al., 2018; Martins et al., 2020; Schweitzer et al., 2020).

449 Substrate showed significantly main effects on the proportions of most of the seven  
450 predominant phyla mentioned above in this current study. It is considered that substrate  
451 could supply attaching material for species which grow adhesively, and tend to adsorb  
452 the bacteria with particle-attaching or biopolymer-degrading capability (Huang et al.,  
453 2020). For example, the filamentous Chloroflexi grow on other microorganisms and  
454 substrate (Kragelund et al., 2007; Miura et al., 2007); and Bacteroidetes prefer for

455 polymers and are frequently found attaching to surfaces, colonizing on particles (Deng  
456 et al., 2019; Fernández-Gómez et al., 2013; Kirchman, 2002; Morgan-Sagastume et al.,  
457 2008). Although Planctomycetes grow as single free-swimming cells, they also appear  
458 as single cells within flocs (Morgan-Sagastume et al., 2008), and are usually found to  
459 adhere to the surfaces of invertebrates (Fuerst et al., 1997), detrital aggregates (Crump  
460 et al., 1999; Delong et al., 1993), and flocs (Huang et al., 2020). Actinobacteria are  
461 chemoorganotrophic bacteria (saprophytes) with branched filaments (Madigan et al.,  
462 2015) and have been described as small free-living cells (Ghai et al., 2013), leading to a  
463 higher proportion in free-living fraction than that in particle-attached fraction  
464 (Bachmann et al., 2018; Huang et al., 2020; Mestre et al., 2017). Therefore, the free- or  
465 attaching-living characteristic of those phyla might contribute to the variations of their  
466 abundance between both treatments in the present study.

467 Although Firmicutes are microorganisms to grow as single free-swimming cells  
468 making them more likely to remain in suspension (Morgan-Sagastume et al., 2008).  
469 And Proteobacteria survive as free-living to live suspended in the water column,  
470 although some species might attach to particles, surfaces, or cells (Fernández-Gómez et  
471 al., 2013; Morgan-Sagastume et al., 2008; Rud et al., 2017; Schweitzer et al., 2020),  
472 substrate did not show significant effect on those two phyla in this present study. And  
473 the reason should be investigated next.

474 The dominant phyla observed in the present study have variable functions. For  
475 instance, Proteobacteria play important roles in the process of nutrient cycling and the  
476 mineralization of organic compounds (Kersters et al., 2006; Kirchman, 2002; Rud et al.,

2017); Bacteroidetes produce extracellular enzymes with degradative capabilities to serve as degraders of polymeric organic matter (Kirchman, 2002; Thomas et al., 2011; Woebken et al., 2007); Chloroflexi reductively dehalogenate organic chlorinated compounds to obtain energy (Gupta, 2013); Actinobacteria are important in the nutrient and biomaterial recycling (Goodfellow and Williams, 1983), responsible for degrading nucleic acids and proteins (Madigan et al., 2015), and for the production of many hydrolytic enzymes (chitinase, chitinolytic, fatty acid, cellulolytic, nitrile hydrolyzing, amylolytic, proteolytic, and lipolytic) (Das et al., 2008); Planctomycetes have function to degrade the biopolymers of adsorbate (Woebken et al., 2007). Therefore, the different bacterial community profiles between both treatments in the current study might contribute to different activities of nitrogen and carbon metabolism in their water body. However, the inferring functions of bacterial community should be induced next to directly estimate the effects of addition of substrate on the bacterial activities.

The interactions of substrate and time on proportions of most of those phyla (except Planctomycetes) also significant in the present study, indicating different development styles of bacterial composition profile between both treatments. Furthermore, all the seven dominant phyla in the present study were significantly affected by time ( $P < 0.05$ ), indicating a time-dependent dynamics of bacterial composition in biofloc systems, similar with that observed in other studies (Baliga et al., 2021; Gao et al., 2019; Jiang et al., 2020; Martínez-Córdova et al., 2018; Xu et al., 2019).

## 5 CONCLUSION



498 In the present study, addition of elastic solid packing filler (nylon, with a diameter  
499 of 15 cm) as substrate that coated 52.4% of the tank internal surface in the biofloc  
500 system nursing *P. vannamei* PL with a salinity of 5‰ showed positive effects on  
501 shrimp growth performance. Furthermore, substrate also showed significant main  
502 effects or interactions with time on most water parameters as well as bacterial diversity  
503 and composition.

504 **Acknowledgements** This work is financially supported by the scientific research  
505 program of the Education Department of Hunan province (18B394), the open projects  
506 of Hunan Provincial Key Laboratory for Molecular Immunity Technology of Aquatic  
507 Animal Diseases (2021KJ001), Changde Research Center for Agricultural  
508 Biomacromolecule (2020AB08).

## 509 REFERENCES

- 510 Addo, F.G., Zhang, S., Manirakiza, B., Ohore, O.E., Shudong, Y., 2021. The impacts  
511 of straw substrate on biofloc formation, bacterial community and nutrient  
512 removal in shrimp ponds. *Bioresour. Technol.* 326, 124727.
- 513 Anand, P.S.S., Balasubramanian, C.P., Christina, L., Kumar, S., Biswas, G., De, D.,  
514 Ghoshal, T.K., Vijayan, K.K., 2019. Substrate based black tiger shrimp, *Penaeus*  
515 *monodon* culture: Stocking density, aeration and their effect on growth  
516 performance, water quality and periphyton development. *Aquaculture*. 507,  
517 411-418.
- 518 Anderson, M.J., 2001. A new method for non-parametric multivariate analysis of

519 variance. Austral Ecol. 26, 32-46.

520 APHA, 1995. Standard Methods for the Examination of Water and Wastewater.

521 American public health association, Washington, DC.

522 Asaduzzaman, M., Wahab, M.A., Mcj, V., Huque, S., Salam, M.A., Azim, M.E., 2008.

523 C/N ratio control and substrate addition for periphyton development jointly

524 enhance freshwater prawn *Macrobrachium rosenbergii* production in ponds.

525 Aquaculture. 280, 117-123.

526 Avnimelech, Y., 2015. Biofloc technology: a practical hand book, 3rd ed. The world

527 aquaculture society, Baton Rouge, Louisiana, EUA.

528 Bachmann, J., Heimbach, T., Hassenrück, C., Kopprio, G.A., Iversen, M.H., Grossart,

529 H.P., Gärdes, A., 2018. Environmental drivers of free-living vs. particle-attached

530 bacterial community composition in the Mauritania upwelling system. Front.

531 Microbiol. 9, 2836.

532 Baliga, P., Goolappa, P.T., Shekar, M., Girisha, S.K., Ramesh, K.S., Udyavara, V.,

533 Venugopal, M.N., 2021. Bacterial communities associated with *Penaues*

534 *vannamei* Boone, 1931 surface and its rearing water in biofloc culture system.

535 Asian Fish. Sci. 34, 34-46.

536 Bolyen, E., Rideout, J.R., Dillon, M.R., Bokulich, N.A., Abnet, C.C., Al-Ghalith,

537 G.A., Alexander, H., Alm, E.J., Arumugam, M., Asnicar, F., Bai, Y., Bisanz, J.E.,

538 Bittinger, K., Brejnrod, A., Brislawn, C.J., Brown, C.T., Callahan, B.J.,

539 Caraballo-Rodríguez, A.M., Chase, J., Cope, E.K., Da Silva, R., Diener, C.,

540 Dorrestein, P.C., Douglas, G.M., Durall, D.M., Duvallet, C., Edwardson, C.F.,

541 Ernst, M., Estaki, M., Fouquier, J., Gauglitz, J.M., Gibbons, S.M., Gibson, D.L.,  
542 Gonzalez, A., Gorlick, K., Guo, J., Hillmann, B., Holmes, S., Holste, H.,  
543 Huttenhower, C., Huttley, G.A., Janssen, S., Jarmusch, A.K., Jiang, L., Kaehler,  
544 B.D., Kang, K.B., Keefe, C.R., Keim, P., Kelley, S.T., Knights, D., Koester, I.,  
545 Kosciulek, T., Kreps, J., Langille, M.G.I., Lee, J., Ley, R., Liu, Y.-X., Loftfield,  
546 E., Lozupone, C., Maher, M., Marotz, C., Martin, B.D., McDonald, D., McIver,  
547 L.J., Melnik, A.V., Metcalf, J.L., Morgan, S.C., Morton, J.T., Naimey, A.T.,  
548 Navas-Molina, J.A., Nothias, L.F., Orchanian, S.B., Pearson, T., Peoples, S.L.,  
549 Petras, D., Preuss, M.L., Priesse, E., Rasmussen, L.B., Rivers, A., Robeson, M.S.,  
550 Rosenthal, P., Segata, N., Shaffer, M., Shiffer, A., Sinha, R., Song, S.J., Spear,  
551 J.R., Swafford, A.D., Thompson, L.R., Torres, P.J., Trinh, P., Tripathi, A.,  
552 Turnbaugh, P.J., Ul-Hasan, S., van der Hooft, J.J.J., Vargas, F., Vázquez-Baeza, Y.,  
553 Vogtmann, E., von Hippel, M., Walters, W., Wan, Y., Wang, M., Warren, J., Weber,  
554 K.C., Williamson, C.H.D., Willis, A.D., Xu, Z.Z., Zaneveld, J.R., Zhang, Y., Zhu,  
555 Q., Knight, R., Caporaso, J.G., 2019. Reproducible, interactive, scalable and  
556 extensible microbiome data science using QIIME 2. *Nat. Biotechnol.* 37,  
557 852-857.

558 Chen, X., Luo, G.-z., Meng, H., Tan, F.Y., 2019. Effect of the particle size on the  
559 ammonia removal rate and the bacterial community composition of bioflocs.  
560 *Aquacult. Eng.* 86, 1-8.

561 Crump, B.C., Armbrust, E.V., Baross, J.A., 1999. Phylogenetic analysis of  
562 particle-attached and free-living bacterial communities in the Columbia River, its

563 estuary, and the adjacent coastal ocean. Appl. Environ. Microbiol. 65, 3192-3204.

564 Das, S., Ward, L.R., Burke, C., 2008. Prospects of using marine actinobacteria as

565 probiotics in aquaculture. Appl. Microbiol. Biotechnol. 81, 419-429.

566 Delong, E.F., Franks, D.G., Alldredge, A.L., 1993. Phylogenetic diversity of

567 aggregate-attached vs. free-living marine bacterial assemblages. Limnol. &

568 Oceanogr. 38, 924-934.

569 Deng, M., Chen, J., Hou, J., Li, D., He, X., 2018. The effect of different carbon

570 sources on water quality, microbial community and structure of biofloc systems.

571 Aquaculture. 482, 103-110.

572 Deng, Y., Xu, X., Yin, X., Lu, H., Chen, G., Yu, J., Ruan, Y., 2019. Effect of stock

573 density on the microbial community in biofloc water and Pacific white shrimp

574 (*Litopenaeus vannamei*) gut microbiota. Appl. Microbiol. Biotechnol. 103,

575 4241-4252.

576 Ebeling, J.M., Timmons, M.B., Bisogni, J.J., 2006. Engineering analysis of the

577 stoichiometry of photoautotrophic, autotrophic, and heterotrophic removal of

578 ammonia–nitrogen in aquaculture systems. Aquaculture. 257, 346-358.

579 Esparza-Leal, H.M., Cardozo, A.P., Wasielesky, W.Jr., 2015. Performance of

580 *Litopenaeus vannamei* postlarvae reared in indoor nursery tanks at high stocking

581 density in clear-water versus biofloc system. Aquacult. Eng. 68, 28-34.

582 Esparza-Leal, H.M., Amaral Xavier, J.A., Wasielesky, W.Jr., 2016. Performance of

583 *Litopenaeus vannamei* postlarvae reared in indoor nursery tanks under biofloc

584 conditions at different salinities and zero-water exchange. Aquacult. Int. 24,

1435-1447.

Esparza-Leal, H.M., Ponce-Palafox, J.T., Alvarez-Ruiz, P., Lopez-Alvarez, E.S., Vazquez-Montoya, N., Lopez-Espinoza, M., Mejia, M.M., Gomez-Peraza, R.L., Nava-Perez, E., 2020. Effect of stocking density and water exchange on performance and stress tolerance to low and high salinity by *Litopenaeus vannamei* postlarvae reared with biofloc in intensive nursery phase. *Aquacult. Int.* 28, 1473-1483.

FAO, 2018. The state of world fisheries and aquaculture - Meeting the sustainable development goals. Licence: CC BY-NC-SA 3.0 IGO, Rome.

Fernández-Gómez, B., Richter, M., Schüller, M., Pinhassi, J., Acinas, S.G., González, J.M., Pedrós-Alió, C., 2013. Ecology of marine Bacteroidetes: a comparative genomics approach. *The ISME Journal*. 7, 1026-1037.

Ferreira, G.S., Santos, D., Schmachtl, F., Machado, C., Fernandes, V., Boegner, M., Schleder, D.D., Seiffert, W.Q., Vieira, F.N., 2021. Heterotrophic, chemoautotrophic and mature approaches in biofloc system for Pacific white shrimp. *Aquaculture*. 533, 736099.

Ferreira, L.M.H., Lara, G., Wasielesky, W.Jr., Abreu, P.C., 2016. Biofilm versus biofloc: Are artificial substrates for biofilm production necessary in the BFT system? *Aquacult. Int.* 24, 921-930.

Fleckenstein, L.J., Kring, N.A., Tierney, T.W., Fisk, J.C., Lawson, B.C., Ray, A.J., 2020. The effects of artificial substrate and stocking density on Pacific white shrimp (*Litopenaeus vannamei*) performance and water quality dynamics in high

607 tunnel-based biofloc systems. Aquacult. Eng. 90, 102093.

608 Fuerst, J.A., Gwilliam, H.G., Lindsay, M., Lichanska, A., Belcher, C., Vickers, J.E.,

609 Hugenholtz, P., 1997. Isolation and molecular identification of planctomycete

610 bacteria from postlarvae of the giant tiger prawn, *Penaeus monodon*. Appl.

611 Environ. Microbiol. 63, 254-262.

612 Furtado, P.S., Poersch, L.H., Wasielesky, W.Jr., 2015. The effect of different alkalinity

613 levels on *Litopenaeus vannamei* reared with biofloc technology (BFT). Aquacult.

614 Int. 23, 345-358.

615 Furtado, P.S., Gaona, C.A.P., Poersch, L.H., Wasielesky, W.Jr., 2014. Application of

616 different doses of calcium hydroxide in the farming shrimp *Litopenaeus*

617 *vannamei* with the biofloc technology (BFT). Aquacult. Int. 22, 1009-1023.

618 Gao, F., Liao, S., Liu, D., Bai, H., Wang, A., Ye, J., 2019. The combination use of

619 *Candida tropicalis* HH8 and *Pseudomonas stutzeri* LZ301 on nitrogen removal,

620 biofloc formation and microbial communities in aquaculture. Aquaculture. 500,

621 50-56.

622 Gaona, C.A.P., Almeida, M.S.d., Viau, V., Poersch, L.H., Wasielesky, W.Jr., 2017.

623 Effect of different total suspended solids levels on a *Litopenaeus vannamei*

624 (Boone, 1931) BFT culture system during biofloc formation. Aquacult. Res. 48,

625 1070-1079.

626 Ghai, R., Mizuno, C.M., Picazo, A., Camacho, A., Rodriguez-Valera, F., 2013.

627 Metagenomics uncovers a new group of low GC and ultra-small marine

628 Actinobacteria. Sci. Rep. 3, 2471.

629 Goodfellow, M., Williams, S.T., 1983. Ecology of Actinomycetes. Annu. Rev.  
630 Microbiol. 37, 189-216.

631 Gupta, R.S., 2013. Molecular Markers for Photosynthetic Bacteria and Insights into  
632 the Origin and Spread of Photosynthesis. in: Beatty, J.T. (Ed.), Advances in  
633 Botanical Research. Academic Press.

634 Hargreaves, J., 2013. Biofloc production systems for aquaculture. Southern Regional  
635 Aquaculture Center, United States, Department of Agriculture, National Institute  
636 of Food and Agriculture.

637 Huang, H.-H., 2020. Novel biofloc technology (BFT) for ammonia assimilation and  
638 reuse in aquaculture in situ. in: Lu, Q., Serajuddin, M. (Eds.), Emerging  
639 technologies and research for eco-friendly aquaculture. IntechOpen, London.

640 Huang, H.-H., Luo, T., Lei, Y.-J., Kuang, W.-Q., Zou, W.-S., Yang, P.-H., 2021. Water  
641 quality, shrimp growth performance and bacterial community in a reusing-water  
642 biofloc system for nursery of *Penaeus vananmei* rearing under a low salinity  
643 condition. Aquacult. Rep. 21, 100894.

644 Huang, L., Guo, H., Chen, C., Huang, X., Chen, W., Bao, F., Liu, W., Wang, S., Zhang,  
645 D., 2020. The bacteria from large-sized bioflocs are more associated with the  
646 shrimp gut microbiota in culture system. Aquaculture. 523, 735159.

647 Huerta-Rabago, J.A., Martinez-Porchas, M., Miranda-Baeza, A., Nieves-Soto, M.,  
648 Rivas-Vega, M.E., Martinez-Cordova, L.R., 2019. Addition of commercial  
649 probiotic in a biofloc shrimp farm of *Litopenaeus vannamei* during the nursery  
650 phase: Effect on bacterial diversity using massive sequencing 16S rRNA.

651       Aquaculture. 502, 391-399.

652       Jiang, W., Ren, W., Li, L., Dong, S., Tian, X., 2020. Light and carbon sources addition

653       alter microbial community in biofloc-based *Litopenaeus vannamei* culture

654       systems. Aquaculture. 515, 734572.

655       Kerstens, K., Vos, P.D., Gillis, M., Swings, J., Stackebrandt, E., 2006. Introduction to

656       the Proteobacteria. in: Dworkin, M., Falkow, S., Rosenberg, E., Schleifer, K.H.,

657       Stackebrandt, E. (Eds.), The Prokaryotes. Springer, New York.

658       Khanjani, M.H., Sajjadi, M.M., Alizadeh, M., Sourinejad, I., 2017. Nursery

659       performance of Pacific white shrimp (*Litopenaeus vannamei* Boone, 1931)

660       cultivated in a biofloc system: the effect of adding different carbon sources.

661       Aquacult. Res. 48, 1491-1501.

662       Kim, Y.-S., Kim, S.-E., Kim, S.-J., Jung, H.-K., Park, J., Jeon, Y.J., Kim, D.-H., Kang,

663       J.-H., Kim, K.-H., 2021. Effects of wheat flour and culture period on bacterial

664       community composition in digestive tracts of *Litopenaeus vannamei* and rearing

665       water in biofloc aquaculture system. Aquaculture. 531, 735908.

666       Kirchman, D.L., 2002. The ecology of Cytophaga–Flavobacteria in aquatic

667       environments. FEMS Microbiol. Ecol. 39, 91-100.

668       Kragelund, C., Caterina, L., Borger, A., Thelen, K., Eikelboom, D., Tandoi, V., Kong,

669       Y., Van Der Waarde, J., Krooneman, J., Rossetti, S., Thomsen, T.R., Nielsen, P.H.,

670       2007. Identity, abundance and ecophysiology of filamentous Chloroflexi species

671       present in activated sludge treatment plants. FEMS Microbiol. Ecol. 59, 671-682.

672       Kumar, S., Anand, P.S.S., De, D., Deo, A.D., Ghoshal, T.K., Sundaray, J.K., Ponniah,



673 A.G., Jithendran, K.P., Raja, R.A., Biswas, G., Lalitha, N., 2017. Effects of  
674 biofloc under different carbon sources and protein levels on water quality, growth  
675 performance and immune responses in black tiger shrimp *Penaeus monodon*  
676 (Fabricius, 1978). Aquacult. Res. 48, 1168-1182.

677 Kumar, V.S., Pandey, P.K., Anand, T., Bhuvaneswari, R., Kumar, S., 2017. Effect of  
678 periphyton (aquamat) on water quality, nitrogen budget, microbial ecology, and  
679 growth parameters of *Litopenaeus vannamei* in a semi-intensive culture system.  
680 Aquaculture. 479, 240-249.

681 Lara, G., Krummenauer, D., Abreu, P.C., Poersch, L.H., Wasielesky, W.Jr., 2017. The  
682 use of different aerators on *Litopenaeus vannamei* biofloc culture system: effects  
683 on water quality, shrimp growth and biofloc composition. Aquacult. Int. 25,  
684 147-162.

685 Liu, G., Zhu, S., Liu, D., Guo, X., Ye, Z., 2017. Effects of stocking density of the  
686 white shrimp *Litopenaeus vannamei* (Boone) on immunities, antioxidant status,  
687 and resistance against *Vibrio harveyi* in a biofloc system. Fish Shellfish Immunol.  
688 67, 19-26.

689 Luis-Villaseñor, I.E., Voltolina, D., Audelo-Naranjo, J.M., Pacheco-Marges, M.R.,  
690 Herrera-Espicueta, V.E., Romero-Beltrán, E., 2016. Effects of biofloc  
691 promotion on water quality, growth, biomass yield and heterotrophic community  
692 in *Litopenaeus vannamei* (Boone, 1931) experimental intensive culture. Ital. J.  
693 Anim. Sci. 14, 3726.

694 Luo, G., Liu, Z., Shan, L., Tan, H., 2019. Using poly-beta-hydroxybutyric as an

695 additional carbohydrate for biofloc in a shrimp *Litopenaeus vannamei* bioflocs  
696 nursery system with brackish water. Aquaculture. 506, 181-187.

697 Madigan, M.T., Martinko, J.M., Bender, K.S., Buckley, D.H., Stahl, D.A., 2015.  
698 Brock biology of microorganisms, 14 ed. Pearson, IL.

699 Magurran, A.E., 2004. Measuring biological diversity. Blackwell Publishing, Oxford.

700 Mani, S., Ramasamy, S.M., Chakrapani, S., Krishna, A., Anand, P.S.S., Lalramchhani,  
701 C., Antony, J., Panigrahi, A., 2021. The effect of natural and artificial periphytic  
702 substrates with biofloc system on shrimp *Penaeus vannamei* (Boone 1931)  
703 culture: growth and immune response. Aquacult. Int. 29, 651-668.

704 Mariana, P., André, G., Felipe, V., Walter, S., Evelyne, B., Rafael, R., Luciane, P.,  
705 2018. Exploring the impact of the biofloc rearing system and an oral WSSV  
706 challenge on the intestinal bacteriome of *Litopenaeus vannamei*. Microorganisms.  
707 6, 1-16.

708 Martin, M., 2011. Cutadapt removes adapter sequences from high-throughput  
709 sequencing reads. Embnet Journal. 17, 10-12.

710 Martínez-Córdova, L.R., Francisco, V.A., Estefanía, G.V., Ortiz-Estrada, á.M.,  
711 Porchas-Cornejo, M.A., Asunción, L.L., Marcel, M.P., 2018. Amaranth and wheat  
712 grains tested as nucleation sites of microbial communities to produce bioflocs  
713 used for shrimp culture. Aquaculture. 497, 503-509.

714 Martins, M.A., Poli, M.A., Legarda, E.C., Pinheiro, I.C., Carneiro, R.F.S., Pereira,  
715 S.A., Martins, M.L., Goncalves, P., Schleder, D.D., Vieira, F.d.N., 2020.  
716 Heterotrophic and mature biofloc systems in the integrated culture of Pacific

717 white shrimp and Nile tilapia. Aquaculture. 514, 734517.

718 Mestre, M., Borrull, E., Sala, M.M., Gasol, J.M., 2017. Patterns of bacterial diversity  
719 in the marine planktonic particulate matter continuum. The ISME Journal. 11,  
720 999-1010.

721 Mishra, J.K., Samocha, T.M., Patnaik, S., Speed, M., Gandy, R.L., Ali, A.-M., 2008.  
722 Performance of an intensive nursery system for the Pacific white shrimp,  
723 *Litopenaeus vannamei*, under limited discharge condition. Aquacult. Eng. 38,  
724 2-15.

725 Miura, Y., Hiraiwa, M.N., Ito, T., Itonaga, T., Watanabe, Y., Okabe, S., 2007. Bacterial  
726 community structures in MBRs treating municipal wastewater: Relationship  
727 between community stability and reactor performance. Water Res. 41, 627-637.

728 Morgan-Sagastume, F., Larsen, P., Nielsen, J.L., Nielsen, P.H., 2008. Characterization  
729 of the loosely attached fraction of activated sludge bacteria. Water Res. 42,  
730 843-854.

731 Olier, B.S., Tubin, J.S.B., Mello, G.L.d., Martinez-Porchas, M., Emerenciano, M.G.C.,  
732 2020. Does vertical substrate could influence the dietary protein level and  
733 zootechnical performance of the Pacific white shrimp *Litopenaeus vannamei*  
734 reared in a biofloc system? Aquacult. Int. 28, 1227-1241.

735 Panigrahi, A., Sundaram, M., Saranya, C., Swain, S., Dash, R.R., Dayal, J.S., 2019.  
736 Carbohydrate sources deferentially influence growth performances, microbial  
737 dynamics and immunomodulation in Pacific white shrimp (*Litopenaeus vannamei*)  
738 under biofloc system. Fish Shellfish Immunol. 86, 1207-1216.

739 Parks, D.H., Tyson, G.W., Hugenholtz, P., Beiko, R.G., 2014. STAMP: statistical  
740 analysis of taxonomic and functional profiles. *Bioinformatics*. 30, 3123-3124.

741 Peiro-Alcantar, C., Rivas-Vega, M.E., Martinez-Porchas, M., Lizarraga-Armenta, J.A.,  
742 Miranda-Baeza, A., Martinez-Cordova, L.R., 2019. Effect of adding vegetable  
743 substrates on *Penaeus vannamei* pre-grown in biofloc system on shrimp  
744 performance, water quality and biofloc composition. *Lat. Am. J. Aquat. Res.* 47,  
745 784-790.

746 Peixoto, S., Silva, E., Costa, C.B., Nery, R.C., Soares, R., 2018. Effect of feeding  
747 frequency on growth and enzymatic activity of *Litopenaeus vannamei* during  
748 nursery phase in biofloc system. *Aquacult. Nutr.* 24, 579-585.

749 Piedrahita, R.H., 2003. Reducing the potential environmental impact of tank  
750 aquaculture effluents through intensification and recirculation. *Aquaculture*. 226,  
751 35-44.

752 Pierri, V., Valter-Severino, D., Goulart-de-Oliveira, K., Manoel-do-Esprito-Santo, C.,  
753 Nascimento-Vieira, F., Quadros-Seiffert, W., 2015. Cultivation of marine shrimp  
754 in biofloc technology (BFT) system under different water alkalinities. *Braz. J.*  
755 *Biol.* 75, 558-564.

756 Ray, A.J., Lotz, J.M., 2017. Comparing salinities of 10, 20, and 30‰ in intensive,  
757 commercial-scale biofloc shrimp (*Litopenaeus vannamei*) production systems.  
758 *Aquaculture*. 476, 29-36.

759 Rezende, P.C., Schleder, D.D., Silva, H.V.d., Henriques, F.M., Lorenzo, M.A.d.,  
760 Seiffert, W.Q., Andreatta, E.R., Vieira, F.d.N., 2018. Prenursery of the Pacific

761 white shrimp in a biofloc system using different artificial substrates. Aquacult.  
762 Eng. 82, 25-30.

763 Rognes, T., Flouri, T., Nichols, B., Quince, C., Mahé, F., 2016. VSEARCH: a versatile  
764 open source tool for metagenomics, PeerJ, e2584.

765 Roy, L.A., Davis, D.A., Saoud, I.P., Boyd, C.A., Pine, H.J., Boyd, C.E., 2010. Shrimp  
766 culture in inland low salinity waters. Rev. Aquacult. 2, 191-208.

767 Rud, I., Kolarevic, J., Holan, A.B., Berget, I., Calabrese, S., Terjesen, B.F., 2017.  
768 Deep-sequencing of the bacterial microbiota in commercial-scale recirculating  
769 and semi-closed aquaculture systems for Atlantic salmon post-smolt production.  
770 Aquacult. Eng. 78, 50-62.

771 Samocha, T.M., 2010. Use of intensive and super-intensive nursery systems.  
772 Nottingham University Press, Nottingham.

773 Schweitzer, R., Arantes, R., Costodio, P.F.S., Santo, C.M.d.E., Arana, L.V., Seiffert,  
774 W.Q., Andreatta, E.R., 2013a. Effect of different biofloc levels on microbial  
775 activity, water quality and performance of *Litopenaeus vannamei* in a tank system  
776 operated with no water exchange. Aquacult. Eng. 56, 59-70.

777 Schweitzer, R., Arantes, R., Baloi, M.F., Costodio, P.F.S., Arana, L.V., Seiffert, W.Q.,  
778 Andreatta, E.R., 2013b. Use of artificial substrates in the culture of *Litopenaeus*  
779 *vannamei* (Biofloc System) at different stocking densities: Effects on microbial  
780 activity, water quality and production rates. Aquacult. Eng. 54, 93-103.

781 Schweitzer, R., Lorenzo, M.A.D., Felipe, D.N.V., Pereira, S.A., Mourino, J.L.P.,  
782 Seiffert, W.Q., Andreatta, E.R., 2017. Nursery of young *Litopenaeus vannamei*

783 post-larvae reared in biofloc- and microalgae-based systems. *Aquacult. Eng.* 78,  
784 140-145.

785 Schweitzer, R., Fonseca, G., Orteney, N., Temistocles Menezes, F.C., Thompson, F.L.,  
786 Thompson, C.C., Gregoracci, G.B., 2020. The role of sedimentation in the  
787 structuring of microbial communities in biofloc-dominated aquaculture tanks.  
788 *Aquaculture*. 514, 734493.

789 Segata, N., Izard, J., Waldron, L., Gevers, D., Miropolsky, L., Garrett, W.S.,  
790 Huttenhower, C., 2011. Metagenomic biomarker discovery and explanation.  
791 *Genome Biol.* 12, R60.

792 Thomas, F., Hehemann, J.-H., Rebuffet, E., Czjzek, M., Michel, G., 2011.  
793 Environmental and gut Bacteroidetes: The food connection. *Front. Microbiol.* 2,  
794 93.

795 Tierney, T.W., Fleckenstein, L.J., Ray, A.J., 2020. The effects of density and artificial  
796 substrate on intensive shrimp *Litopenaeus vannamei* nursery production.  
797 *Aquacult. Eng.* 89, 102063.

798 Tinh, T.H., Koppenol, T., Ngoc, H.T., Verreth, J.A.J., Verdegem, M.C.J., 2021. Effects  
799 of carbohydrate sources on a biofloc nursery system for whiteleg shrimp  
800 (*Litopenaeus vannamei*). *Aquaculture*. 531.

801 Van Wyk, P., Davishodgkins, M., Laramore, R., Main, K.L., Mountain, J., Scarpa, J.,  
802 1999. Farming marine shrimp in recirculating freshwater systems. Florida  
803 department of agriculture and consumer services, Tallahassee.

804 Vargas-Albores, F., Martínez-Córdova, L.R., Gollas-Galván, T., Garibay-Valdez, E.,

805 Emerenciano, M.G.C., Lago-Leston, A., Mazorra-Manzano, M.,  
806 Martínez-Porchas, M., 2019. Inferring the functional properties of bacterial  
807 communities in shrimp-culture bioflocs produced with amaranth and wheat seeds  
808 as fouler promoters. *Aquaculture*. 500, 107-117.

809 Wang, R., Guo, Z., Tang, Y., Kuang, J., Duan, Y., Lin, H., Jiang, S., Shu, H., Huang, J.,  
810 2020. Effects on development and microbial community of shrimp *Litopenaeus*  
811 *vannamei* larvae with probiotics treatment. *Amb Express*. 10, 109.

812 Woebken, D., Fuchs, B., Kuypers, M., Amann, R., 2007. Potential interactions of  
813 particle-associated anammox bacteria with bacterial and Archaeal partners in the  
814 Namibian upwelling system. *Appl. Environ. Microbiol.* 73, 4648-4657.

815 Xu, W., Xu, Y., Huang, X., Hu, X., Xu, Y., Su, H., Li, Z., Yang, K., Wen, G., Cao, Y.,  
816 2019. Addition of algicidal bacterium CZBC1 and molasses to inhibit  
817 cyanobacteria and improve microbial communities, water quality and shrimp  
818 performance in culture systems. *Aquaculture*. 502, 303-311.

819 Xu, W.-J., Pan, L.-Q., Zhao, D.-H., Huang, J., 2012. Preliminary investigation into the  
820 contribution of bioflocs on protein nutrition of *Litopenaeus vannamei* fed with  
821 different dietary protein levels in zero-water exchange culture tanks. *Aquaculture*.  
822 350, 147-153.

823 Zhang, K., Pan, L., Chen, W., Wang, C., 2017. Effect of using sodium bicarbonate to  
824 adjust the pH to different levels on water quality, the growth and the immune  
825 response of shrimp *Litopenaeus vannamei* reared in zero-water exchange  
826 biofloc-based culture tanks. *Aquacult. Res.* 48, 1194-1208.

**Table 1** Water parameters in the biofloc systems with (sB) and without (nB) addition of elastic solid packing filler (nylon) as substrate, during the 28-days experiment culturing *Penaeus vannamei* at a salinity of 5.0‰

| parameters                                  | Treatments |             | P-value   |        |             |
|---------------------------------------------|------------|-------------|-----------|--------|-------------|
|                                             | nB         | sB          | Substrate | Time   | Interaction |
| TSS (mg L <sup>-1</sup> )                   | 148.5±31.3 | 491.3±150.2 | 0.009     | 0.116  | 0.594       |
| WTN (mg L <sup>-1</sup> )                   | 76.8±11.2  | 76.3±9.6    | 0.057     | <0.001 | 0.013       |
| DTN (mg L <sup>-1</sup> )                   | 13.0±2.6   | 14.7±3.6    | 0.890     | <0.001 | <0.001      |
| BTN (mg L <sup>-1</sup> )                   | 63.8±9.3   | 61.6±12.5   | 0.052     | <0.001 | 0.085       |
| TAN (mg L <sup>-1</sup> )                   | 0.55±0.25  | 0.43±0.06   | 0.010     | 0.227  | 0.002       |
| Nitrite (mg L <sup>-1</sup> )               | 0.37±0.28  | 0.10±0.03   | 0.352     | 0.348  | 0.342       |
| Nitrate (mg L <sup>-1</sup> )               | 0.51±0.14  | 0.56±0.08   | 0.924     | 0.274  | 0.252       |
| Biofloc volume (mL L <sup>-1</sup> )        | 8.8±2.3    | 8.3±2.3     | 0.044     | <0.001 | <0.001      |
| Turbidity (NTU)                             | 111.9±56.3 | 299.5±92.0  | 0.002     | 0.005  | 0.059       |
| CAK (mg L <sup>-1</sup> CaCO <sub>3</sub> ) | 373.7±12.4 | 306.5±51.7  | <0.001    | <0.001 | <0.001      |
| Temperature (°C)                            | 26.9±0.7   | 27.1±0.6    | 0.656     | <0.001 | 0.012       |
| pH                                          | 7.20±0.14  | 7.11±0.03   | 0.001     | 0.001  | <0.001      |
| Dissolved oxygen (mg L <sup>-1</sup> )      | 5.85±0.32  | 5.63±0.59   | 0.215     | <0.001 | 0.764       |

Note: BTN, the total nitrogen contained in biofloc; CAK, carbonate alkalinity; DTN, the dissolved total nitrogen in water; NTU, nephelometric turbidity units; TAN, total ammonia nitrogen; TSS, total suspended solids; WTN, the whole total nitrogen in water.



**Table 2** Growth performance of *Penaeus vannamei* postlarvae cultured in the biofloc systems with (sB) and without (nB) addition of elastic solid packing filler (nylon) as substrate, during the 28-days experiment at a salinity of 5.0‰

| parameters                         | B             | sB            | <i>P</i> -value |
|------------------------------------|---------------|---------------|-----------------|
| Final mean body weight (g)         | 0.36 ± 0.04   | 0.40 ± 0.03   | 0.596           |
| Survival rate (%)                  | 81.0 ± 7.1    | 96.3 ± 3.6    | 0.011           |
| FCR                                | 0.98 ± 0.08   | 0.76 ± 0.06   | 0.044           |
| wiW (g week <sup>-1</sup> )        | 0.090 ± 0.014 | 0.099 ± 0.008 | 0.652           |
| SGR (% d <sup>-1</sup> )           | 17.7 ± 0.5    | 18.1 ± 0.4    | 0.581           |
| Productivity (kg m <sup>-3</sup> ) | 1.14 ± 0.09   | 1.54 ± 0.12   | 0.029           |

Note: FCR, feed conversion rate; SGR, specific growth rate; wiW, weekly increment of body weight.

**Table 3** Bacterial alpha diversity indexes in the biofloc systems with (sB) and without (nB) addition of elastic solid packing filler (nylon) as substrate, during the 28-days experiment culturing *Penaeus vannamei* at a salinity of 5.0‰

| Indexes    | Treatments   |              | P-value   |        |             |
|------------|--------------|--------------|-----------|--------|-------------|
|            | B            | sB           | Substrate | Time   | Interaction |
| Shannon    | 6.14±0.18    | 6.77±0.07    | 0.002     | <0.001 | <0.001      |
| OTU counts | 5713.5±368.2 | 6238.3±353.8 | 0.427     | 0.024  | 0.572       |
| Margalef   | 343.9±22.0   | 387.7±28.0   | 0.367     | 0.007  | 0.471       |
| Heip       | 0.013±0.001  | 0.018±0.001  | 0.026     | 0.012  | 0.544       |
| Pielou     | 0.493±0.012  | 0.538±0.003  | 0.024     | <0.001 | 0.016       |
| B-P        | 0.193±0.020  | 0.152±0.014  | 0.098     | 0.002  | 0.676       |
| Simpson    | 0.927±0.010  | 0.955±0.003  | 0.043     | <0.001 | 0.127       |

OTU, operational taxonomic unit; B-P, Berger-Parker index.

**Table 4** Bacterial community distance between the biofloc systems with (sB) and without (nB) addition of elastic solid packing filler (nylon) as substrate, during the 28-days experiment culturing *Penaeus vannamei* at a salinity of 5.0‰

| Group 1 | Group 2 | Jaccard distance | Permutations | pseudo- <i>F</i> | <i>P</i> -value |
|---------|---------|------------------|--------------|------------------|-----------------|
| B       | B       | 0.761 ± 0.361    | -            | -                | -               |
| sB      | sB      | 0.768 ± 0.365    | -            | -                | -               |
| B       | sB      | 0.941 ± 0.007    | 999          | 3.96             | 0.001           |

**Table 5** Proportions (%) of dominant phyla in the biofloc systems with (sB) and without (nB) addition of elastic solid packing filler (nylon) as substrate, during the 28-days experiment culturing *Penaeus vannamei* at a salinity of 5.0‰

| Phylum          | Treatments |            | P-value   |        |             |
|-----------------|------------|------------|-----------|--------|-------------|
|                 | nB         | sB         | Substrate | Time   | Interaction |
| Actinobacteria  | 13.67±3.34 | 10.00±4.26 | <0.001    | <0.001 | <0.001      |
| Bacteroidetes   | 23.18±4.01 | 16.87±5.57 | <0.001    | <0.001 | <0.001      |
| Chloroflexi     | 3.79±2.57  | 0.63±0.22  | <0.001    | 0.001  | 0.002       |
| Firmicutes      | 4.53±2.09  | 5.92±1.79  | 0.087     | 0.001  | 0.010       |
| Planctomycetes  | 8.57±2.10  | 12.49±1.00 | 0.006     | 0.035  | 0.486       |
| Proteobacteria  | 43.82±6.10 | 45.90±2.46 | 0.405     | <0.001 | 0.038       |
| Verrucomicrobia | 0.63±0.18  | 6.06±3.42  | <0.001    | <0.001 | <0.001      |

**Fig. 1** Mean body weight of *Penaeus vannamei* postlarvae cultured in the biofloc systems with (sB) and without (nB) addition of elastic solid packing filler (nylon) as substrate, with time elapsing during the 28-days experiment at a salinity of 5.0‰. Error bar indicates  $\pm$  standard deviation (SD).

**Fig. 2** Alpha diversity indexes of bacterial communities in the biofloc systems with (sB) and without (nB) addition of elastic solid packing filler (nylon) as substrate, with time elapsing during the 28-days experiment culturing *Penaeus vannamei* at a salinity of 5.0‰.

**Fig. 3** PCA diagram plotting samples basing on their OTU composition profiles. Samples were collected from the biofloc systems with (sB) and without (nB) addition of elastic solid packing filler (nylon) as substrate at time points of 7, 14, 21 and 28 d during experiment culturing *Penaeus vannamei* at a salinity of 5.0‰.

**Fig. 4** Heatmap displaying bacterial composition profiles at phylum level (a) and differential phyla (b) in the biofloc systems with (sB) and without (nB) addition of elastic solid packing filler (nylon) as substrate, with time elapsing during the 28-days experiment culturing *Penaeus vannamei* at a salinity of 5.0‰.

**Fig. 5** Cladogram (a) and Linear discriminant analysis (LDA) scores of LEfSe (linear discriminant analysis effect size) analysis showing biomarkers in the biofloc systems with (sB) and without (nB) addition of elastic solid packing filler (nylon) as substrate, with time elapsing during the 28-days experiment culturing *Penaeus vannamei* at a salinity of 5.0‰.

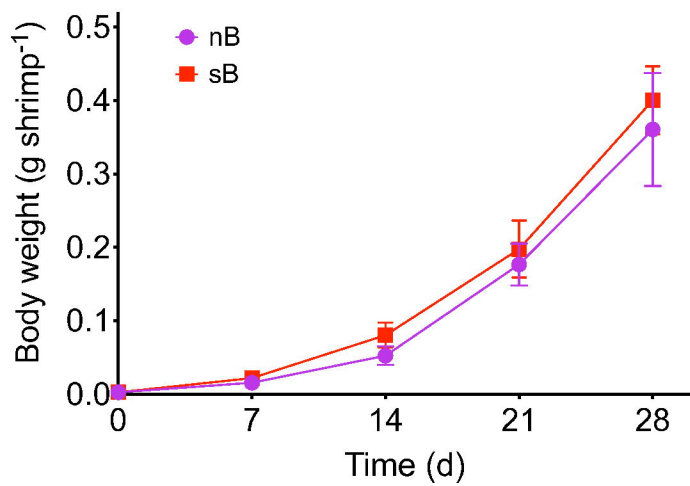

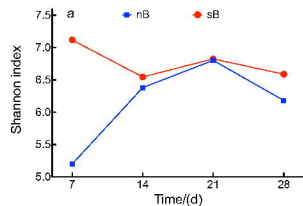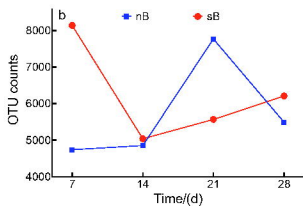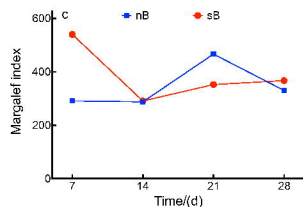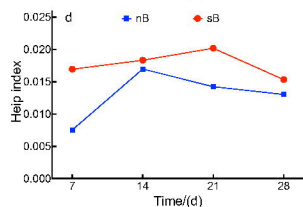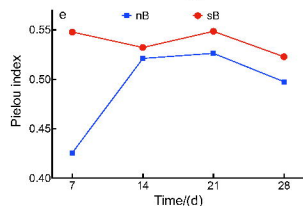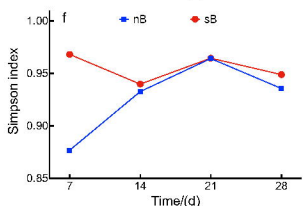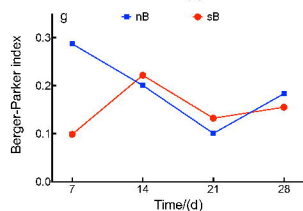

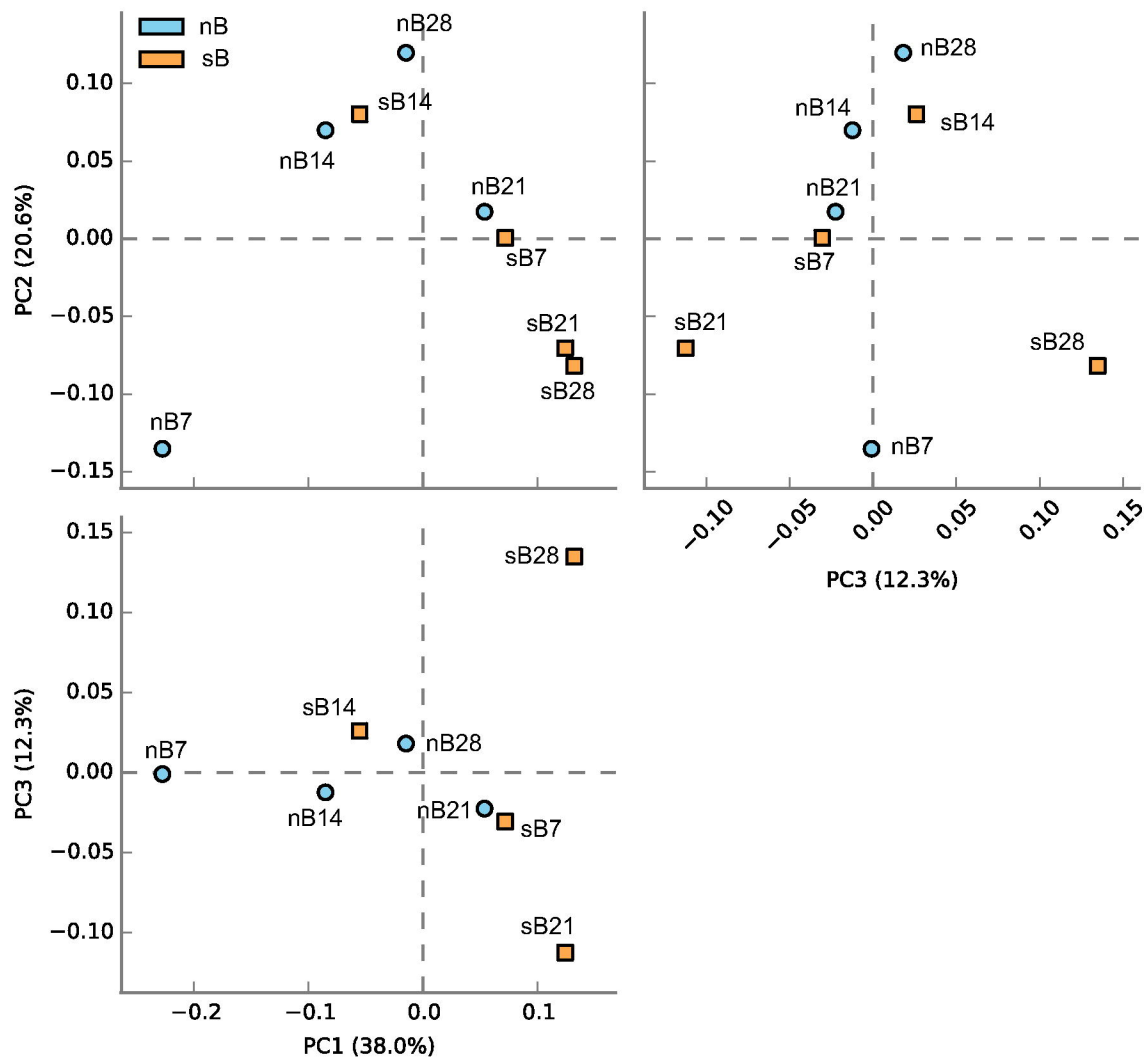



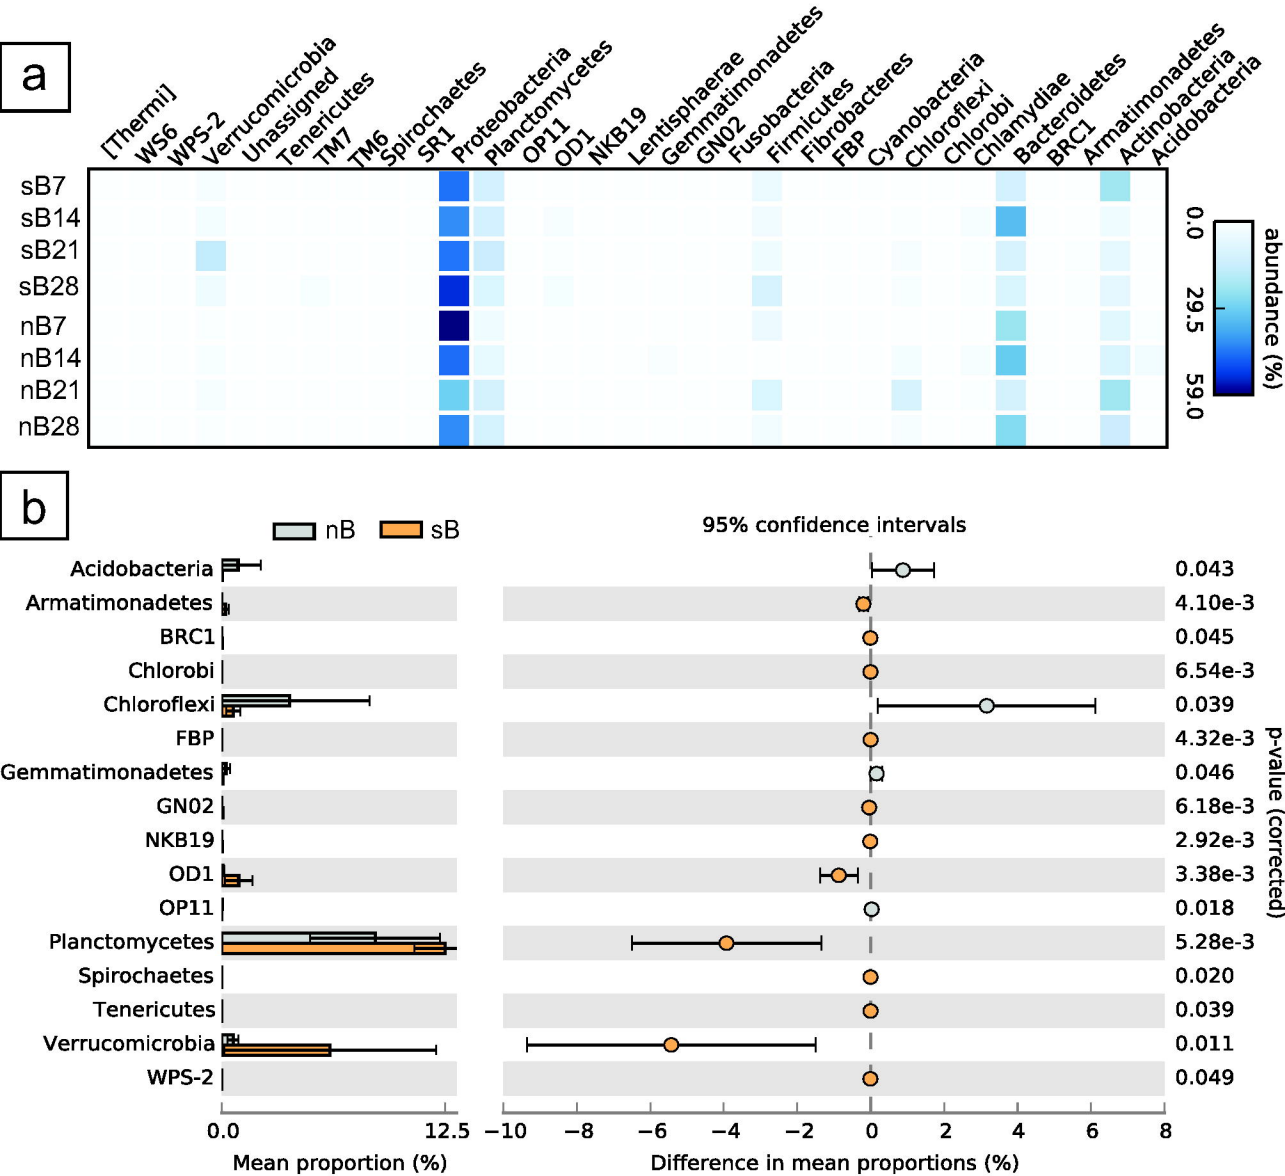

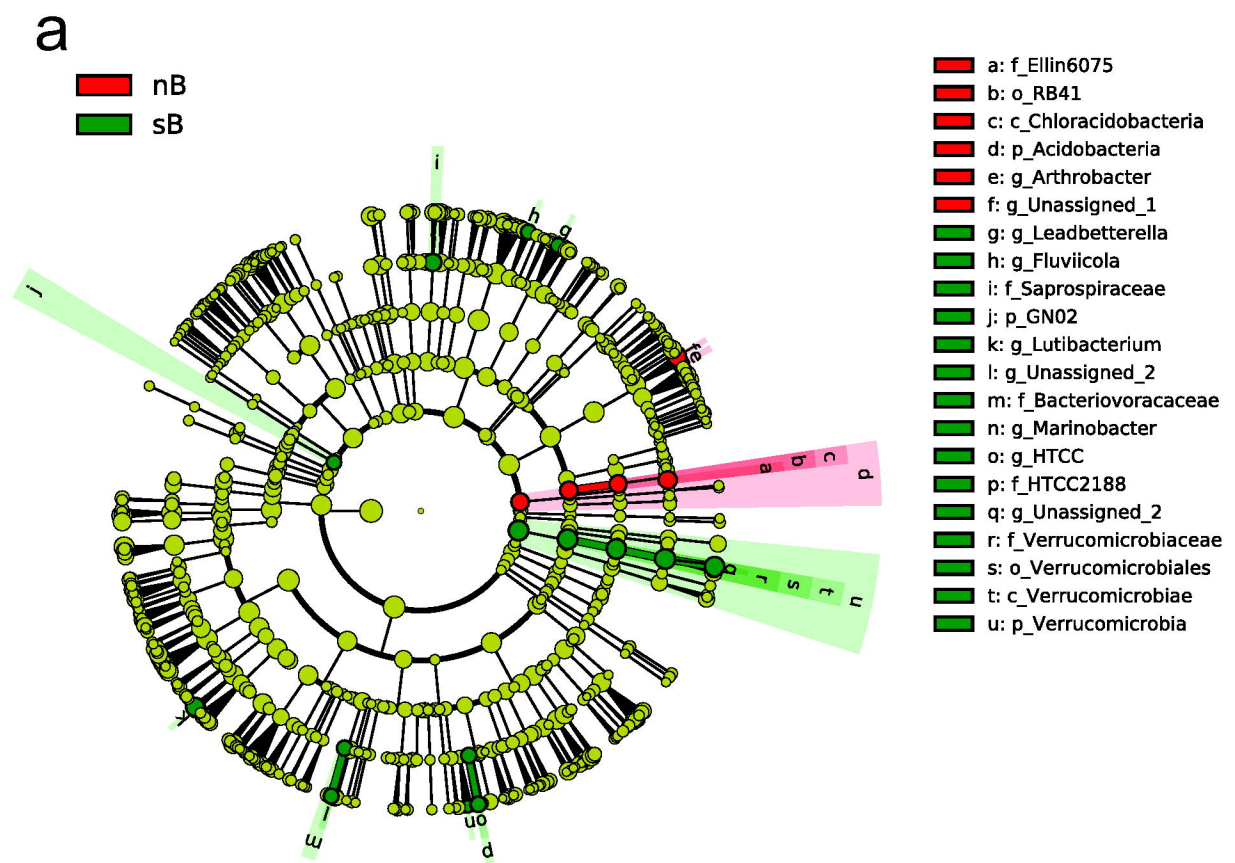

Source: https://www.biorxiv.org/content/10.1101/2022.02.08.479639v2.full.pdf
